# Supplementary material for: Two-year neurodevelopmental data for preterm infants born over an 11-year period in England and Wales, 2008–2018: a retrospective study using the National Neonatal Research Database
Source: PubMed Central journal article supplement — Arch Dis Child Fetal Neonatal Ed. 2023 Oct 3;109(2):143–50. doi: 10.1136/archdischild-2023-325746 (PMC10894848; doi:10.1136/archdischild-2023-325746), 2023-10-03
Supplement: fetalneonatal-2023-325746supp001.pdf [file fetalneonatal-2023-325746supp001.pdf]

## Supplementary Materials to: Two-year Neurodevelopmental Data for Preterm Infants Born Over an 11-year Period in England and Wales, 2008-2018: a Retrospective Study using the National Neonatal Research Database

### Table of Contents

|           |                                                                                                                                                                                                       |
|-----------|-------------------------------------------------------------------------------------------------------------------------------------------------------------------------------------------------------|
| Table S1  | Univariate logistic regression analyses to predict whether an infant has a two-year record. Reference categories in grey                                                                              |
| Table S2  | Multiple logistic regression model to predict whether an infant has a two-year record                                                                                                                 |
| Figure S1 | Infants with a two-year record in the NNRD, whole cohort (<30 weeks) by birth year                                                                                                                    |
| Table S3  | Two-year record by Operational Delivery Network                                                                                                                                                       |
| Table S4  | Results of available two-year neurodevelopmental assessments                                                                                                                                          |
| Figure S2 | Infants who had a standardised developmental assessment, and choice of assessment over time                                                                                                           |
| Table S5  | Principal neurodevelopmental outcomes by gestation for children with a record of neurodevelopmental assessment at two years, excluding infants who were known to have died after neonatal discharge   |
| Table S6  | Principal neurodevelopmental outcomes by birth epoch for children with a record of neurodevelopmental assessment at two years, excluding infants who were known to have died after neonatal discharge |

**Table S1: Univariate logistic regression analyses to predict whether an infant has a record of two-year neurodevelopmental assessment**

| Variable                                                                |                                        | Number | Unadjusted odds ratio | Standard error | P-value | 95% confidence interval |      |
|-------------------------------------------------------------------------|----------------------------------------|--------|-----------------------|----------------|---------|-------------------------|------|
| Birth year                                                              |                                        | 41,505 | 1.21                  | 0.004          | <0.001  | 1.20                    | 1.21 |
| Gestation at birth (weeks)                                              |                                        | 41,505 | 0.96                  | 0.006          | <0.001  | 0.95                    | 0.97 |
| Maternal age at birth                                                   |                                        | 41,159 | 1.02                  | 0.002          | <0.001  | 1.02                    | 1.03 |
| IMD decile                                                              |                                        | 38,433 | 1.02                  | 0.004          | <0.001  | 1.02                    | 1.03 |
| Number of neonatal units in which the infant received care (n = 41,505) | 1                                      | 21,800 |                       |                |         |                         |      |
|                                                                         | 2                                      | 15,351 | 1.04                  | 0.022          | 0.084   | 1.00                    | 1.08 |
|                                                                         | 3 or more                              | 4,354  | 0.89                  | 0.030          | 0.001   | 0.84                    | 0.95 |
| Level of neonatal unit at discharge (n = 41,505)                        | Special care baby unit (lowest)        | 5,711  | 0.64                  | 0.020          | <0.001  | 0.60                    | 0.68 |
|                                                                         | Local neonatal unit                    | 18,301 | 0.87                  | 0.019          | <0.001  | 0.84                    | 0.91 |
|                                                                         | Neonatal intensive care unit (highest) | 17,493 |                       |                |         |                         |      |

Reference categories are in grey

**Table S2: Multiple logistic regression model to predict whether an infant has a record of two-year neurodevelopmental assessment (N = 38,243)**

| Variable                                                            |                                     | Adjusted odd ratio | Standard error | P value | 95% confidence interval |      |
|---------------------------------------------------------------------|-------------------------------------|--------------------|----------------|---------|-------------------------|------|
| Birth year                                                          |                                     | 1.19               | 0.004          | <0.001  | 1.19                    | 1.21 |
| Gestation at birth                                                  |                                     | 0.95               | 0.007          | <0.001  | 0.94                    | 0.97 |
| Maternal age at time of delivery                                    |                                     | 1.02               | 0.002          | <0.001  | 1.01                    | 1.02 |
| Index of Multiple Deprivation (IMD) decile                          |                                     | 1.03               | 0.004          | <0.001  | 1.02                    | 1.04 |
| Number of different neonatal units to which the infant was admitted | 1                                   |                    |                |         |                         |      |
|                                                                     | 2                                   | 1.00               | 0.026          | 0.919   | 0.95                    | 1.06 |
|                                                                     | 3 or more                           | 0.85               | 0.034          | <0.001  | 0.78                    | 0.92 |
| Level of unit of discharge                                          | Special care baby unit (SCBU)       | 0.64               | 0.024          | <0.001  | 0.59                    | 0.69 |
|                                                                     | Local neonatal unit (LNU)           | 0.84               | 0.021          | <0.001  | 0.80                    | 0.88 |
|                                                                     | Neonatal intensive care unit (NICU) |                    |                |         |                         |      |

Reference categories in grey.

**Figure S1: Infants with a two-year neurodevelopmental record in the NNRD: whole cohort (<30 weeks), by birth year**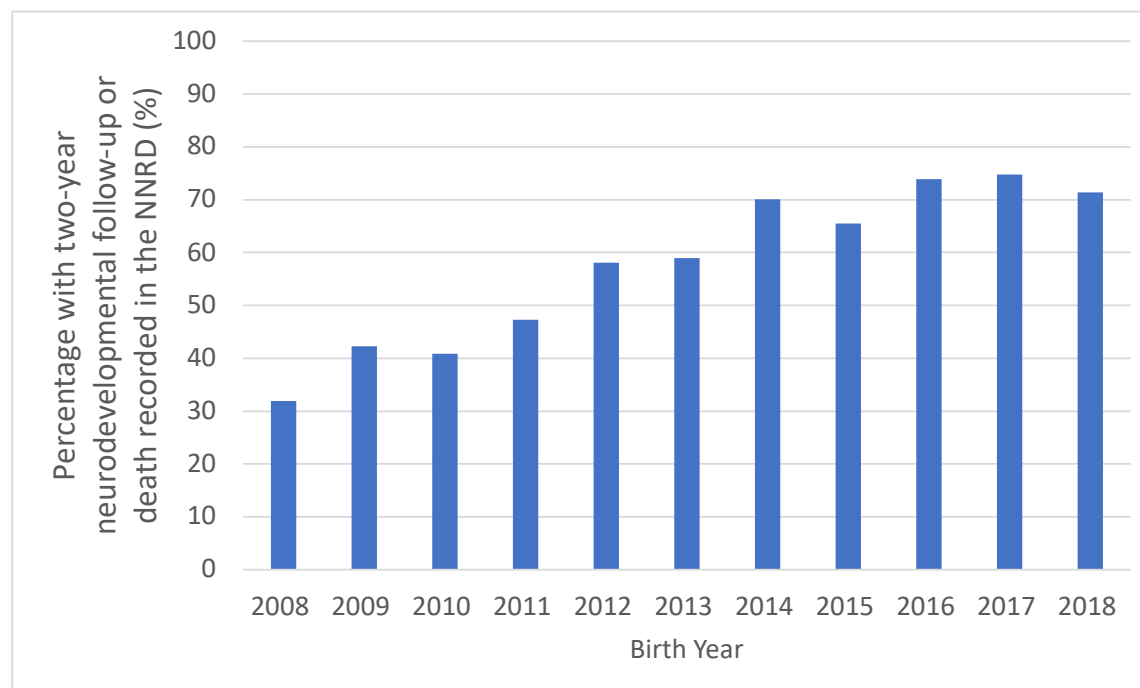

**Table S3: Percentage of infants with a two-year neurodevelopmental record by Operational Delivery Network**

| Operational delivery network (coded) | Number of infants | Infants with two-year neurodevelopmental record, n (%) |
|--------------------------------------|-------------------|--------------------------------------------------------|
| 1                                    | 3123              | 1640 (52.5)                                            |
| 2                                    | 2082              | 1125 (54.0)                                            |
| 3                                    | 5657              | 3055 (54.0)                                            |
| 4                                    | 3100              | 1683 (54.3)                                            |
| 5                                    | 3697              | 2059 (55.7)                                            |
| 6                                    | 2106              | 1175 (55.8)                                            |
| 7                                    | 4076              | 2284 (56.0)                                            |
| 8                                    | 2768              | 1630 (58.9)                                            |
| 9                                    | 2751              | 1628 (59.2)                                            |
| 10                                   | 3584              | 2272 (63.4)                                            |
| 11                                   | 1045              | 666 (63.7)                                             |
| 12                                   | 4140              | 2644 (63.9)                                            |
| 13                                   | 3376              | 2264 (67.1)                                            |
| Total                                | 41505             | 24125                                                  |

**Table S4: Results of available two-year neurodevelopmental assessments**

| <b>Question</b><br>(From TRPG/ SEND/ NNAP 2-year corrected age outcome form)    | <b>Impairment recorded, n (%)*</b> | <b>Missing, n</b> |
|---------------------------------------------------------------------------------|------------------------------------|-------------------|
| <b>Communication</b>                                                            |                                    |                   |
| Does this child have any difficulty with communication?                         | 6207 (27)                          | 887               |
| Does this child have difficulty with speech (<10 words/signs)?                  | 5964 (26)                          | 1008              |
| Does this child have difficulty with understanding outside of familiar context? | 1640 (7.3)                         | 1464              |
| Does the child have <5 meaningful words, vocalisations or signs?                | 2966 (13)                          | 1103              |
| Is this child unable to understand words or signs?                              | 882 (3.9)                          | 1421              |
| <b>Neuromotor</b>                                                               |                                    |                   |
| Is this child unable to walk without assistance?                                | 1851 (7.9)                         | 473               |
| Is this child's gait non-fluent or abnormal reducing mobility?                  | 2539 (11)                          | 585               |
| Does this child have difficulty with the use of both hands?                     | 650 (2.8)                          | 661               |
| Does this child have any difficulty with the use of one hand?                   | 991 (4.3)                          | 700               |
| Does this child have any difficulty walking?                                    | 2758 (12)                          | 335               |
| Is this child unstable or needs to be supported when sitting?                   | 727 (3.1)                          | 612               |
| Is this child unable to sit?                                                    | 482 (2.1)                          | 546               |
| Is this child unable to use hands (i.e. to feed)?                               | 628 (2.7)                          | 820               |
| <b>Vision</b>                                                                   |                                    |                   |
| Is this child blind or sees light only?                                         | 91 (0.4)                           | 1373              |
| Does this child have visual defect that is not fully correctable?               | 425 (1.9)                          | 1588              |
| Does this child have any visual problems (including squint)?                    | 2219 (9.8)                         | 1127              |
| <b>Auditory</b>                                                                 |                                    |                   |
| Does this child have a hearing impairment?                                      | 842 (3.8)                          | 1347              |
| Does this child have hearing impairment not correctable with aids?              | 186 (0.8)                          | 1527              |
| Does this child have hearing impairment corrected by aids?                      | 313 (1.4)                          | 1410              |
| <b>Development</b>                                                              |                                    |                   |
| Is the child's development more than 12 months behind corrected age?            | 1402 (9.1)                         | 3139              |
| Is the child's development between 6 - 12 months behind corrected age?          | 2161 (13)                          | 3139              |
| Is the child's development between 3-6 months behind corrected age?             | 3093 (18)                          | 3139              |

\*Percentage of non-missing

**Figure S2: Infants who had a standardised developmental assessment, and choice of assessment over time**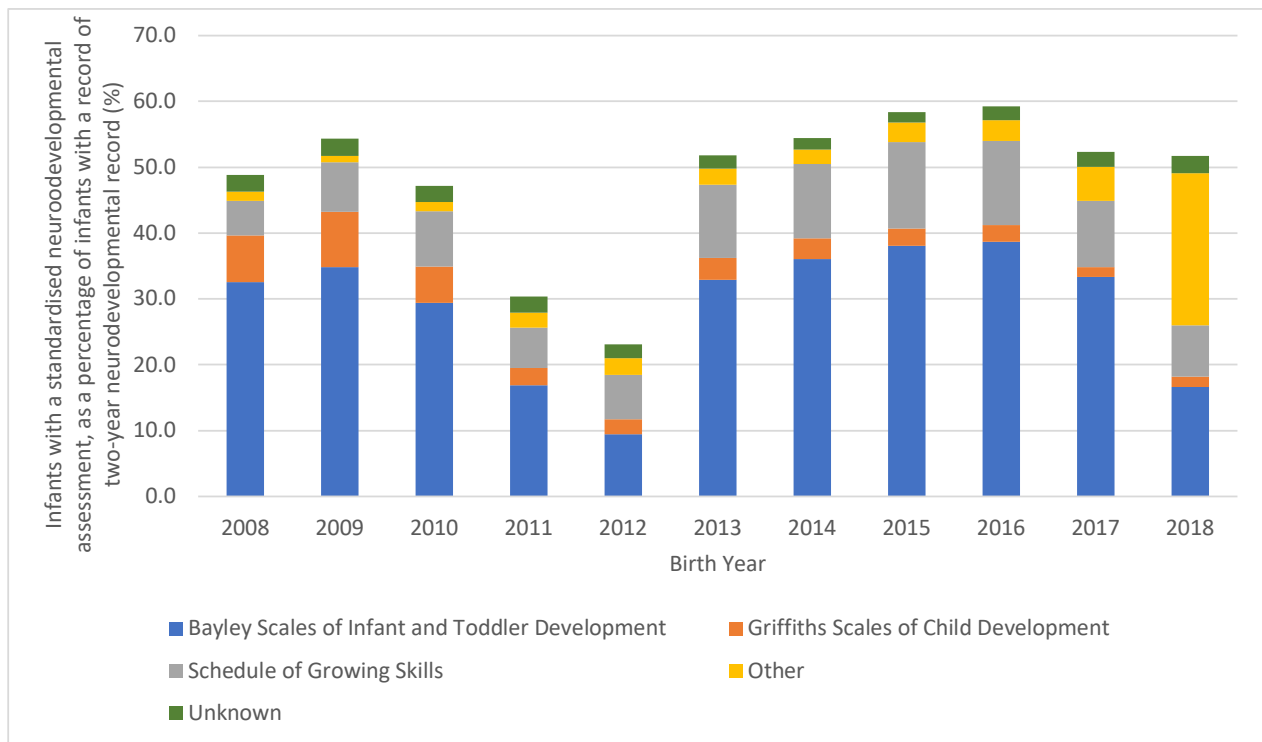**Table S5: Principal neurodevelopmental outcomes by gestation for children with a record of neurodevelopmental assessment at two years, excluding those known to have died after neonatal discharge**

| Gestation (weeks) | Developmental delay |              |                  |                | Neuromotor: is this child unable to walk without assistance? |                   | Communication: Does this child have <5 meaningful words, vocalisations or signs? |                   | Vision: is this child blind or sees light only? |                   | Auditory: Does this child have hearing impairment not correctable with aids? |                   |
|-------------------|---------------------|--------------|------------------|----------------|--------------------------------------------------------------|-------------------|----------------------------------------------------------------------------------|-------------------|-------------------------------------------------|-------------------|------------------------------------------------------------------------------|-------------------|
|                   | Data available, n   | Mild*, n (%) | Moderate*, n (%) | Severe*, n (%) | Data available, n                                            | Impairment, n (%) | Data available, n                                                                | Impairment, n (%) | Data available, n                               | Impairment, n (%) | Data available, n                                                            | Impairment, n (%) |
| <24               | 544                 | 126 (23)     | 105 (19)         | 123 (23)       | 596                                                          | 107 (18)          | 572                                                                              | 179 (31)          | 570                                             | 9 (1.6)           | 566                                                                          | 16 (2.8)          |
| 24                | 1404                | 295 (21)     | 232 (17)         | 198 (14)       | 1542                                                         | 216 (14)          | 1492                                                                             | 366 (25)          | 1471                                            | 11 (0.7)          | 1452                                                                         | 26 (1.8)          |
| 25                | 2007                | 343 (17)     | 284 (14)         | 186 (9.3)      | 2241                                                         | 240 (11)          | 2189                                                                             | 408 (19)          | 2140                                            | 14 (0.7)          | 2132                                                                         | 21 (1.0)          |
| 26                | 2873                | 442 (15)     | 345 (12)         | 215 (7.5)      | 3255                                                         | 267 (8.2)         | 3177                                                                             | 456 (14)          | 3146                                            | 16 (0.5)          | 3125                                                                         | 33 (1.1)          |
| 27                | 3714                | 547 (15)     | 347 (9.3)        | 217 (5.8)      | 4151                                                         | 304 (7.3)         | 4060                                                                             | 472 (12)          | 4007                                            | 10 (0.2)          | 3995                                                                         | 33 (0.8)          |
| 28                | 4765                | 675 (14)     | 424 (8.9)        | 242 (5.1)      | 5382                                                         | 341 (6.3)         | 5217                                                                             | 581 (11)          | 5166                                            | 12 (0.2)          | 5147                                                                         | 30 (0.6)          |
| 29                | 5336                | 675 (13)     | 424 (7.9)        | 221 (4.1)      | 6142                                                         | 376 (6.1)         | 5972                                                                             | 504 (8.4)         | 5909                                            | 19 (0.3)          | 5838                                                                         | 27 (0.5)          |

\*Definitions for developmental delay: 'mild' (three to six months delay), 'moderate' (six to 12 months delay), 'severe' (over 12 months delay)

**Table S6: Principal neurodevelopmental outcomes by epoch for children with neurodevelopmental assessment at two years, excluding those known to have died after neonatal discharge**

| Birth Epoch | Developmental delay |              |                  |                | Neuromotor: is this child unable to walk without assistance? |                   | Communication: Does this child have <5 meaningful words, vocalisations or signs? |                   | Vision: is this child blind or sees light only? |                   | Auditory: Does this child have hearing impairment not correctable with aids? |                   |
|-------------|---------------------|--------------|------------------|----------------|--------------------------------------------------------------|-------------------|----------------------------------------------------------------------------------|-------------------|-------------------------------------------------|-------------------|------------------------------------------------------------------------------|-------------------|
|             | Data available, n   | Mild*, n (%) | Moderate*, n (%) | Severe*, n (%) | Data available, n                                            | Impairment, n (%) | Data available, n                                                                | Impairment, n (%) | Data available, n                               | Impairment, n (%) | Data available, n                                                            | Impairment, n (%) |
| 2008 – 2010 | 3574                | 476 (13)     | 333 (9.3)        | 216 (6.0)      | 4337                                                         | 373 (8.6)         | 3809                                                                             | 394 (10)          | 3811                                            | 12 (0.3)          | 3773                                                                         | 50 (1.3)          |
| 2011 – 2014 | 7814                | 1225 (16)    | 827 (11)         | 520 (6.7)      | 9427                                                         | 707 (7.5)         | 8459                                                                             | 1027 (12)         | 8293                                            | 37 (0.4)          | 8253                                                                         | 61 (0.7)          |
| 2015 – 2018 | 9295                | 1392 (15)    | 1001 (11)        | 666 (7.2)      | 11421                                                        | 771 (6.8)         | 10411                                                                            | 1545 (15)         | 10305                                           | 42 (0.4)          | 10229                                                                        | 75 (0.7)          |

\*Definitions for developmental delay: 'mild' (three to six months delay), 'moderate' (six to 12 months delay), 'severe' (over 12 months delay)
